# Supplementary material
Source: Research Square preprint supplement (doi:10.21203/rs.3.rs-9383378/v1)
Supplement: Supplementary file 1 [file fd44732fb4e7e25c0410f6c7.pdf]

# Supplementary Material

## Evolution Shapes Enzyme Turnover Numbers to Support Cellular Objectives

Samira L. van den Bogaard<sup>a</sup>, Lorenzo Wormer<sup>b,c</sup>, Nadja A. Henke<sup>b</sup>,  
Lars M. Blank<sup>a,d</sup>, and Tobias B. Alter<sup>a,\*</sup>

<sup>a</sup>Institute of Applied Microbiology, Aachen Biology and Biotechnology;  
RWTH Aachen University, Aachen, Germany

<sup>b</sup>Institute of Process Engineering in Life Sciences;  
Karlsruhe Institute of Technology, Karlsruhe, Germany

<sup>c</sup>Institute of Functional Interfaces;  
Karlsruhe Institute of Technology, Eggenstein-Leopoldshafen, Germany

<sup>d</sup>WSS Research Center Catalaix;  
RWTH Aachen University, Aachen, Germany

\*Corresponding author (tobias.alter@rwth-aachen.de)

April 20, 2026

### Contents

|          |                                                                        |          |
|----------|------------------------------------------------------------------------|----------|
| <b>1</b> | <b>Supplementary Methods</b>                                           | <b>2</b> |
| 1.1      | Updated version of the <i>E. coli</i> Protein Allocation Model         | 2        |
| 1.1.1    | Configuration of protein sectors                                       | 3        |
| 1.1.2    | Complex protein-reaction associations                                  | 4        |
| 1.2      | A pipeline for the parametrization of Protein Allocation Models        | 6        |
| 1.2.1    | Initializing the coarse-grained protein sectors                        | 6        |
| 1.2.2    | Initializing the active enzyme sector                                  | 6        |
| 1.2.3    | The PAMparametrizer framework: optimization of $k_{\text{cat}}$ values | 7        |
| 1.2.4    | Sector configuration                                                   | 7        |
| 1.2.5    | Parameter optimization                                                 | 8        |
| 1.2.6    | Selecting the most influential enzymes                                 | 8        |
| 1.2.7    | Optimization of selected parameters                                    | 8        |
| 1.2.8    | Determining model fitness                                              | 8        |

|          |                                                                                                |           |
|----------|------------------------------------------------------------------------------------------------|-----------|
| 1.3      | Genetic Algorithm for kinetic parameter optimization . . . . .                                 | 9         |
| 1.3.1    | A population of parameter sets . . . . .                                                       | 10        |
| 1.3.2    | Description of a generation: elitism, selection, crossover<br>and mutation . . . . .           | 11        |
| 1.3.3    | Gene flow events and parallel computing . . . . .                                              | 11        |
| 1.3.4    | Optimizing the unused enzyme sector at zero growth . . . . .                                   | 12        |
| 1.3.5    | Software implementation . . . . .                                                              | 12        |
| 1.4      | Comparing quantitative proteomics measurements to simulated<br>enzyme concentrations . . . . . | 13        |
| 1.4.1    | Mapping peptide concentrations to catalytic units . . . . .                                    | 13        |
| 1.4.2    | Unit conversions . . . . .                                                                     | 14        |
| <b>2</b> | <b>Supplementary Discussion . . . . .</b>                                                      | <b>15</b> |
| 2.1      | Description of the updated Protein Allocation Model structure . . . . .                        | 15        |
| 2.1.1    | Translational protein sector . . . . .                                                         | 15        |
| 2.1.2    | Unused protein sector . . . . .                                                                | 15        |
| <b>3</b> | <b>Supplementary Tables . . . . .</b>                                                          | <b>17</b> |
| <b>4</b> | <b>Supplementary Figures . . . . .</b>                                                         | <b>22</b> |

# 1 Supplementary Methods

## 1.1 Updated version of the *E. coli* Protein Allocation Model

The original Protein Allocation Model (PAM), described by Alter et al. (2021) [1], incorporates three coarse-grained protein sectors which are related to the metabolic phenotype of the organism under study. These sectors include (1) the active enzyme sector, which adds enzyme kinetics to the reaction stoichiometry present in metabolic models, (2) the translational protein sector, which describes proteins required for translation, and (3) the unused enzymes sector, including the proteins which are not used at their full capacity. The unused enzymes sector compensates for enzymes that are not operating at their maximum *in vivo* efficiency. As all condition-dependent fluctuations in protein efficiency are compensated for by the unused enzymes sector, we can assume that all enzymes in the active enzyme sectors operate at their maximum *in vivo* turnover rate, and the  $k_{cat}$  values are *in vivo* maximal turnover numbers under biologically feasible substrate and product concentrations. Recent advancements in our understanding of protein allocation have led to significant updates, reflecting improved correlations with fundamental principles of research allocation and experimental findings.

Besides revision of the sectors, additional constraints were added to allow for more the complexity of protein-reaction associations present in real biological systems. The integration of isozymes, promiscuous enzymes and enzyme complexes increased to protein burden of biomass production, resulting in a lower

24 final growth rate and an earlier start of overflow metabolism compared to the  
25 original model structure. In the updated PAM structure, turnover numbers or  
26  $k_{\text{cat}}$  values represent the maximum 'in vivo' catalytic rate per enzyme taking ki-  
27 netic effects, such as reversibility, into account. As such, the genome-scale set of  
28  $k_{\text{cat}}$  values needs to be parametrized, i.e., adapted to the new model structure.

### 29 1.1.1 Configuration of protein sectors

30 In the previous version of the PAM, the protein fraction allocated of the trans-  
31 lational sector was related to the growth rate. Using experimental data from  
32 Schmidt et al. (2016) [2], we find that translational protein abundance does  
33 not exhibit a strictly linear correlation with growth rate across the full range of  
34 physiologically plausible growth rates (Supplementary Figure S3), but there is a  
35 linear relation between substrate uptake rate and translational proteins. In ad-  
36 dition, You and colleagues (2013) showed that the fraction of ribosomal proteins  
37 is indirectly related to the glucose uptake rate by a regulatory network medi-  
38 ated by CRP-cAMP [3]. Furthermore, substrate availability has been shown to  
39 be correlated to synthesis of ribosomes and rRNA through ppGpp [4, 5]. In-  
40 deed, relating the translational protein fraction seems to yield a better fit to  
41 quantitative proteomics data (Supplementary Figure S3).

42 To correct for un- and underused enzymes, the PAM includes an unused  
43 enzymes sector, based on the findings of O'Brien and colleagues (2015) [1, 6].  
44 This sector enables us to assume all the enzymes in the metabolic sector are  
45 operating at their maximal *in vivo* catalytic efficiency under biologically plau-  
46 sible conditions. The previous version of the PAM assumed the unused protein  
47 fraction to be zero at the maximal growth rate. The unused proteins consists  
48 out of those proteins which do not result in a change of phenotype, e.g. ex-  
49 change fluxes or growth rate, when the amount of that protein is decreased [7].  
50 Based on this definition, we can assume that the amount of unused proteins  
51 at zero growth equals the maximal amount of overexpressed protein that leads  
52 to zero growth. Furthermore, there are strong suggestions that there is still a  
53 small fraction of unused proteins left at the maximum growth rate, which are  
54 related to bet-hedging strategies to ensure optimal growth under changing con-  
55 ditions [7, 8]. To correct for this bet-hedging behaviour, we make the following  
56 assumptions: (1) 37% of the metabolic proteins is unused at zero growth [9],  
57 and (2) if strains are subjected to adaptive laboratory evolution all metabolic  
58 proteins are performing at their full 'in vivo' capacity at the maximum growth  
59 rate [8, 10]. Based on (1), a lower bound for the number of enzymes in the  
60 unused enzymes sector can be defined. However, the fraction of the underused  
61 metabolic enzymes at zero growth is unknown, condition dependent, and quan-  
62 tification requires absolute proteomics across conditions [6]. The total unused  
63 enzymes sector at zero growth can be optimized after consolidating the qual-  
64 itative  $k_{\text{cat}}$  distribution, with (1) providing a close enough starting point for  
65 generating a PAM.

66 For *E. coli* the maximal growth rate was assumed to be 1.63 doublings  
67 per hour, corresponding to  $1.63 \cdot \ln(2) = 1.13$  1/h [10]. Although the we can

Table S1: Novel parametrization of the *Escherichia coli*) Protein Allocation Model, including the relation between the translational protein fraction and the substrate uptake rate ( $v_s$ ), and between the unused protein fraction and the growth rate ( $\mu$ ).

| Protein Sector                                  | Relation                                        | Units                                                                    | Reference |
|-------------------------------------------------|-------------------------------------------------|--------------------------------------------------------------------------|-----------|
| Translational Proteins<br>( $E_{translation}$ ) | $3.9 \cdot 10^{-2} + 3.7 \cdot 10^{-3} v_{glc}$ | Intercept: $g_{protein}/mmol_{glc}$<br>Slope: $g_{protein}/mmol_{glc}/h$ | [2, 3]    |
| Unused Enzymes<br>( $E_{unused}$ )              | $8.8 \cdot 10^{-3} - 0.13 v_{glc}$              | Intercept: $g_{protein}/mmol_{glc}$<br>Slope: $g_{protein}/mmol_{glc}/h$ | [8–10]    |

68 use effect of ALE and recombinant protein expression on the growth rate to  
69 derive a relation between the unused enzyme sectors and the growth rate, the  
70 amount of active proteins is determined by the substrate uptake rate via cAMP  
71 regulation [1,6]. As a consequence, the unused enzyme sector is linearly related  
72 to the substrate uptake rate. The new parameter sets are integrated in the PAM  
73 as described by Alter, et al. (2021) [1]. The updated relations are summarized  
74 in Supplementary Table S1.

### 75 1.1.2 Complex protein-reaction associations

76 The previous version of the PAM makes use of the central dogma in its most  
77 modest form: each enzyme is associated to one single reaction and each reaction  
78 is associated to a single enzyme. This is not relevant in biological settings as  
79 most protein-reaction relationships are more complex [11]. The protein-reaction  
80 associations can take multiple forms: isozymes (a single reaction can be cat-  
81 alyzed by multiple proteins), promiscuous enzymes (a single enzyme can cat-  
82 alyze multiple reactions), and enzyme complexes (multiple enzymes combined  
83 catalyze a single reaction). The separate forms are defined by AND (additive),  
84 and OR (exclusive) relations, or a combination thereof. The updated version  
85 of the PAM includes a single variable for each enzyme-reaction relation, which  
86 together determine the flux through that reaction.

$$v_{rxn,i} = \sum_{j \in \text{enz},i} v_{catalysis,i,j} \quad (1)$$

$$v_{catalysis,i,j} = k_{cat,i,j} E_j$$

87 where reaction  $i$  is catalyzed by enzyme  $E_i$  enzymes, and  $v_{catalysis,i,j}$  repre-  
88 sents the flux through reaction  $i$ , which is established by catalysis of enzyme  $j$ .  
89 The protein-reaction relation (isozyme, promiscuous enzyme, or enzyme com-  
90 plex), determines the exact mathematical implementation of the general rule in  
91 Eq 1.

92 1. **Isozymes.** If multiple isozymes are associated with a single reaction, they  
93 can independently catalyze a reaction. As a consequence, the summed  
94 catalytic potential of the isozymes limits the upper bound of the associated  
95 reaction.

$$\begin{aligned}
v_{rxn,i} &= v_{catalysis,i,j} + v_{catalysis,i,k} \\
v_{catalysis,i,j} &= k_{cat,i,j} E_j \\
v_{catalysis,i,k} &= k_{cat,i,k} E_k
\end{aligned} \tag{2}$$

96 where reaction  $i$  is catalyzed by two different enzymes  $j$  and  $k$ . Each  
97 reaction-enzyme relation has a separate catalytic efficiency defined by  
98  $k_{cat,i,j}$  and  $k_{cat,i,k}$ , respectively.

99 **2. Promiscuous enzymes.** In the current definition of the enzyme-reaction  
100 associations, a single enzyme can be associated with two constraints, related  
101 to two protein-reaction associations.

$$\begin{aligned}
v_{catalysis,i,j} &= k_{cat,i,j} E_j \\
v_{catalysis,l,j} &= k_{cat,l,j} E_j
\end{aligned} \tag{3}$$

102 Here, both reaction  $i$  and  $l$  are catalyzed by the same enzyme, again with  
103 reaction-enzyme specific catalytic efficiencies.

104 **3. Enzyme complexes.** Enzyme complexes represent an additive (AND)  
105 relation between two or more polypeptides. The combination of the polypep-  
106 tides results in a functional enzyme. Thus, the proteins which are related  
107 by an AND relation are not independent of each other. In this case, the  
108 protein resources allocated required to catalyze the associated reaction,  
109 depends on concentrations of the of all peptides involved in the enzyme  
110 complex. Therefore, each enzyme complex is represented in the model  
111 as a single, lumped, enzyme variable, representing all enzyme instances  
112 included in the AND relationship, with the molmass being the sum of all  
113 individual peptide molmasses.

$$\text{molmass}_{enzyme\text{complex}} = \sum_{j \in \text{enz}} \text{molmass}_j \tag{4}$$

114 Apart from the biological relevant enzyme motifs discussed previously, the  
115 relation between reactions and proteins is complicated because of the mathemat-  
116 ical definition of reaction directionality. In the PAM all reactions are irreversible,  
117 reversible reactions are split in a forward and reverse reactions. Similarly, each  
118 protein has a forward and reverse variable, which are related to the forward and  
119 reverse components of a reaction, respectively.

$$v_{rxn,i} = v_{rxn,i,fwd} - v_{rxn,i,rev} \tag{5}$$

$$E_i = E_{i,fwd} + E_{i,rev} \tag{6}$$

$$\begin{aligned}
\frac{1}{k_{cat,fwd,i}} v_{rxn,i,fwd} &\leq E_{i,fwd} \\
\frac{1}{k_{cat,rev,i}} v_{rxn,i,rev} &\leq E_{i,rev}
\end{aligned} \tag{7}$$

122 This formulation allows for separation of the forward and reverse components  
123 of enzyme catalysis.

## 124 **1.2 A pipeline for the parametrization of Protein Alloca-** 125 **tion Models**

126 The entire parametrization framework is split in three steps: (1) preprocessing,  
127 (2) parametrization, and (3) analysis. During preprocessing, the sectors are  
128 initialized. The slope and the intercept for the translational protein sector  
129 and unused enzymes sectors are obtained by fitting to experimental data, or  
130 obtained from a closely related model organism. Also, the active enzyme sector  
131 is initialized using *in silico*  $k_{\text{cat}}$  values from machine learning algorithms, and  
132 possibly changing the median  $k_{\text{cat}}$ . After the protein sectors are initialized,  
133 a PAM is build and the  $k_{\text{cat}}$  values are optimized using the PAMparametrizer.  
134 After optimizing the qualitative relations between the  $k_{\text{cat}}$  values of the enzymes,  
135 the quantitative protein burden is optimized to match experimental data by  
136 optimizing the unused enzyme sector at zero growth (more details in 1.1.1). The  
137 results of one or multiple PAMparametrizer runs can be subsequently analyzed,  
138 and compared, and the most accurate models should be selected for further  
139 validation. An overview of the parametrization workflow is given in Figure S1.

### 140 **1.2.1 Initializing the coarse-grained protein sectors**

141 As described by Alter et al. (2021), the translational protein sector and unused  
142 enzymes sector are coarse-grained protein sectors representing proteins required  
143 for translation, and proteins which are underused, respectively [1]. The rela-  
144 tion between the protein sectors and the phenotype can either be determined  
145 using experiments, or can be assumed to be similar to the relations in *E. coli* or  
146 another closely related model organism. Both relations are first defined as func-  
147 tions of the growth rate, which will be converted to functions of the substrate  
148 uptake rate of all provided substrates in the first step of the PAMparametrizer.

149 To obtain the relation between the translational protein sector and the  
150 growth rate rate, quantitative proteomics data at multiple growth rates, be-  
151 fore overflow-like phenotypes, are required. For the unused enzyme sector, the  
152 fraction of heterologous protein can be used to assess the amount of unused  
153 proteins at zero growth, as described in the previous section 1.1.1. Examples of  
154 how to perform overexpression experiments are an eGFP overexpression assay  
155 in *E. coli* [12], or the analysis of the effect of mCherry overexpression on growth  
156 rate in *Saccharomyces cerevisiae* (*S. cerevisiae*) [13]. More details about the  
157 procedure can be found in the documentation and notebooks of the GitHub  
158 repository (<https://github.com/iAMB-RWTH-Aachen/PAMParametrizer>).

### 159 **1.2.2 Initializing the active enzyme sector**

160 To initiate the active enzyme sector, an estimation of the parameter values, and  
161 the gene-protein-reaction associations of the metabolic reactions are required.

162 The initial  $k_{\text{cat}}$  values in this study were obtained from the GotEnzymes web  
 163 interface [14], and mapped to UniProt identifiers [15]. To enhance the starting  
 164 position for optimization, the  $k_{\text{cat}}$ s can be multiplied by a factor selected after  
 165 scanning a range of potential values.

### 166 1.2.3 The PAMparametrizer framework: optimization of $k_{\text{cat}}$ values

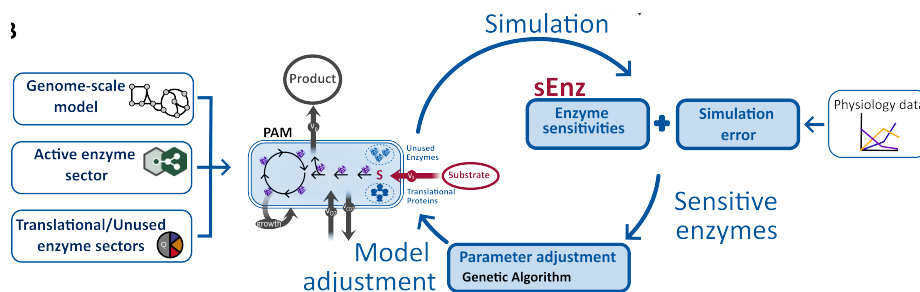

Figure S1: Overview of the PAMparametrizer workflow.

167 After a PAM is setup with coarse-grained enzyme sectors for each substrate  
 168 and an initial set of turnover numbers, the turnover numbers have to be adjusted  
 169 to correctly simulate experimentally observed behaviour. The PAMparametrizer  
 170 aims to minimize the error between the simulated and experimentally measured  
 171 fluxes by altering the kinetic parameters stored in the active enzyme sector of  
 172 the protein allocation model. Based on the results of simulations over a range  
 173 of substrate uptake rates, the enzymes which have the most control over the  
 174 biomass production rate are selected for optimization. The  $k_{\text{cat}}$  values of these  
 175 enzymes are subsequently optimized in a genetic algorithm. The best solution  
 176 is used to reparametrize the model, and to determine the model performance.  
 177 The parametrization workflow will repeat until a user-defined performance or  
 178 maximal number of iterations is reached. After consolidating the  $k_{\text{cat}}$  distribu-  
 179 tion, the amount of unused enzyme sector at zero growth is fitted to match the  
 180 experimental data, using 37% of the total protein amount as lower bound. In the  
 181 following sections, each step in the parametrization workflow will be discussed.  
 182 An overview of the parametrization workflow is given in S1.

### 183 1.2.4 Sector configuration

184 The coarse-grained protein sectors parameters are linearly related to the sub-  
 185 strate uptake rate, and the sector parameters are thus dependent on the sub-  
 186 strate. The PAMparametrizer automatically establishes the relation between  
 187 the substrate uptake rate and the protein sector using the relation between the  
 188 substrate uptake rate and growth rate as computed by a genome-scale model  
 189 (without protein limitation). From the relationship between the growth rate and  
 190 substrate uptake rate, the linear fit of the substrate uptake rate and respective  
 191 protein sector can be obtained for all substrates.

### 192 **1.2.5 Parameter optimization**

193 After initialization of the model, the  $k_{\text{cat}}$  values are further optimized. The  
194 optimization of the parameters can be separated in four steps.

- 195 1. Selecting the most influential enzymes
- 196 2. Optimization of the selected  $k_{\text{cat}}$  values
- 197 3. Model reparametrization
- 198 4. Fitness evaluation

199 These steps are repeated until either the maximal number of iterations, or a  
200 predefined fitness is reached. If the error converges, all  $k_{\text{cat}}$  values in the model  
201 are optimized.

### 202 **1.2.6 Selecting the most influential enzymes**

203 To decrease the complexity of the optimization, a predefined number of enzymes  
204 are selected for parameter optimization. Selecting the enzymes is based enzyme  
205 sensitivity coefficients calculated using sEnz [16]. These sensitivity coefficients  
206 relate to the effect of changes in the enzyme concentration on the growth rate.  
207 As the enzyme sensitivity may change with changing conditions, simulations  
208 over a range of substrate uptake rates are used to find the most important  
209 enzymes. The enzymes with the highest mean enzyme sensitivity coefficient  
210 over all simulations are optimized.

### 211 **1.2.7 Optimization of selected parameters**

212 The  $k_{\text{cat}}$  values for each forward and reverse reaction associated with the selected  
213 enzymes are modified in a genetic algorithm for parameter optimization (see  
214 Supplementary Methods 1.3). This genetic algorithm uses random mutations,  
215 crossover, elitism and selection to change the parameter set, aiming to decrease  
216 the distance between simulation results and experimental data. The PAM is  
217 subsequently updated with the new set of parameters and the fidelity of the  
218 model is evaluated.

### 219 **1.2.8 Determining model fitness**

220 As well the genetic algorithm, as the PAMparametrizer aim to improve the  
221 prediction fidelity of the PAM. The difference between the model predictions  
222 and experimental measurements are determined by calculating the coefficient  
223 of determination ( $R^2$ ) between the model simulations and experimental data.  
224 The  $R^2$  value quantifies how much of the variance in the experimental data  
225 is explained by the model predictions, serving as a key metric for evaluating  
226 simulated fluxes with experimental measurements. Therefore, maximizing the  
227 mean  $R^2$  of all data points is the objective in both algorithms.

$$R^2 = 1 - \frac{\text{RSS}}{\text{TSS}}$$

$$\text{RSS} = \sum (v_{\text{sim}} - v_{\text{exp}})^2 \quad (8)$$

$$\text{TSS} = \sum (\overline{v_{\text{exp}}} - v_{\text{exp}})^2$$

Where RSS is the residual sum of squared, that is the squared difference between simulated ( $v_{\text{sim}}$ ) and experimentally measured ( $v_{\text{exp}}$ ) fluxes. TSS represents the total sum of squares, representing the variability in the data, e.g. the squared difference between the mean of all measurements ( $\overline{v_{\text{exp}}}$ ) and the individual datapoints. For large datasets, the experimental measurements used by the genetic algorithm to determine the  $R^2$ , are uniformly sampled to decrease the runtime. Furthermore, if simulation of the production of byproducts not observed experimentally can be penalized by setting the measured exchange flux for these byproducts to zero.

### 1.3 Genetic Algorithm for kinetic parameter optimization

A genetic algorithm is an optimization technique inspired by the principles of natural selection and genetics. It iteratively evolves a population of candidate solutions to a given problem through processes such as selection, crossover, and mutation, aiming to improve their fitness. Genetic algorithms are capable of efficiently searching large and complex solution spaces, often finding near-optimal solutions for problems where traditional methods may struggle [17]. Each genetic algorithm consists of (1) a set of variables to optimize, (2) populations of individuals, where an individual is an independent set of variables, (3) a fitness function, used as optimization objective, and (4) methods to create new individuals from the existing ones [17].

In short, the genetic algorithm creates populations of individuals. During one generation of a genetic algorithm, the fittest individuals are selected and modified using crossover and mutation, followed by calculation of the fitness of each individual. After a number of generations, the populations are combined and reshuffled, and the workflow is repeated. Each of these iterations is called a gene flow event. After a number of gene flow events, the final population is saved and the best individual is selected. An overview is given in Figure S2, and the associated hyperparameters are summarized in Table S2. The relevant packages and functionalities of the software implementation are shown in Table S3.

The implementation of the genetic algorithm for kinetic parameter optimization is inspired by the genetic algorithm for metabolic engineering by Alter et al. (2018) [18]. In the following sections, we describe the details of the genetic algorithm for kinetic parameter optimization.

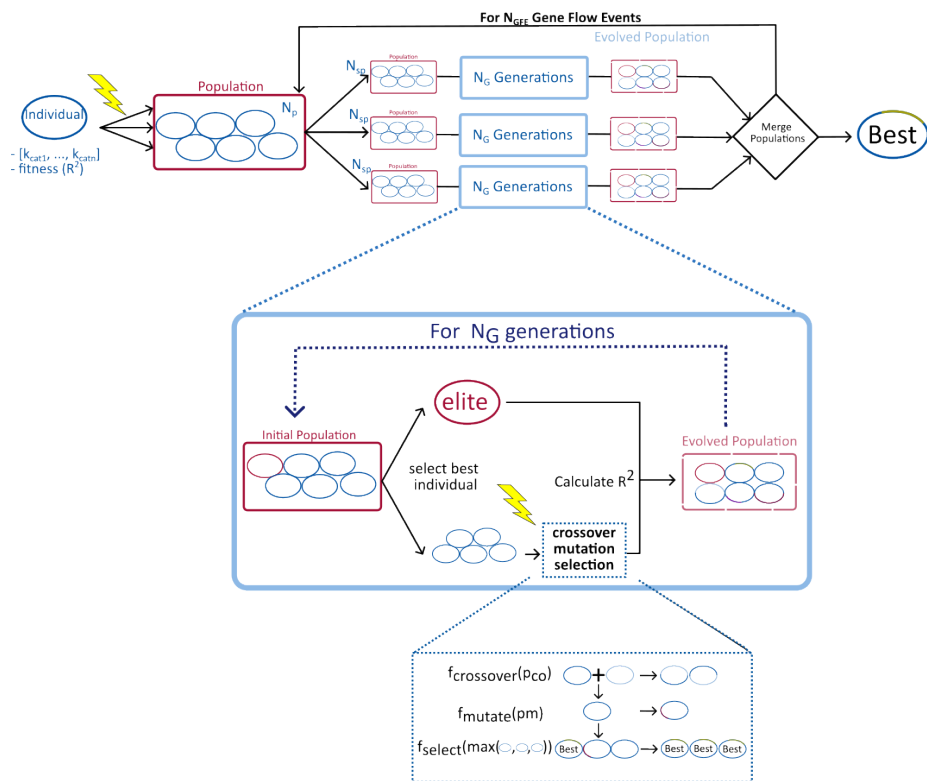

Figure S2: Overview of the Genetic Algorithm used for the optimization of  $k_{cat}$  values. Each individual is associated with a list of  $k_{cat}$  values. First, a population of  $N_P$  individuals is created by mutating the original list of  $k_{cat}$ s. This population is split into different subpopulations of  $N_{SP}$  individuals, marking the start of the first gene flow event. After the best solution ('elite') is saved, the individuals of each subpopulation undergo crossover, mutation, and selection, based on a crossover  $p_{co}$ , and mutation probability  $p_m$ , for  $N_G$  generations. After  $N_G$  generations, the subpopulations are merged, and will be splitted again to perform parallel generations. This will be repeated for  $N_{GFE}$  gene flow events. Afterwards, the best individual out of the entire population is selected, and returned.

### 264 1.3.1 A population of parameter sets

265 In the problem of optimizing the  $k_{cat}$  values for the selected enzymes, each indi-  
 266 vidual in the population represents a list of  $k_{cat}$  values related specific enzyme-  
 267 reaction associations. An individual thus represents a list of numeric values, and  
 268 contains information about the minimal and maximal possible  $k_{cat}$  values, the  
 269 associated enzymes, reactions, and directionality of the catalysis. The number  
 270 of selected enzymes  $N_E$  to optimize, is user-defined and indirectly relates to the

271 size of the individual. As a single enzyme can catalyze multiple reactions as well  
272 in the forward, as reverse direction, the size of the individual depends on the  
273 number of  $k_{\text{cat}}$ s associated with the selected enzymes. A population is simply  
274 a list of individuals, with length  $N_p$ .

275 The initial state of an individual is based on the  $k_{\text{cat}}$  values in the model.  
276 When the population is initiated, the list of  $k_{\text{cat}}$  values are mutated with a user  
277 determined mutation probability ( $P_m$ ) and the fitness of the mutated individuals  
278 is reassessed.

### 279 **1.3.2 Description of a generation: elitism, selection, crossover and** 280 **mutation**

281 During a single generation of the genetic algorithm, the individuals in the pop-  
282 ulation are splitted in subpopulations with size  $N_{sp}$  and subjected to elitism,  
283 selection, crossover, and mutation, aiming to sample the solution space in an  
284 effective manner.

285 In order to only maintain the best solutions, the fittest individuals of the  
286 subpopulation are selected during elitism and selection. First, the best indi-  
287 vidual (elite) is extracted from the subpopulation and protected from further  
288 modification. The remaining  $N_{sp} - 1$  individuals are subjected to selection for  
289 breeding the subsequent population, referred to as offspring. During selection,  
290 three individuals are randomly drawn from the population. Each of the drawn  
291 individuals is replaced by the best of the three. This procedure is repeated until  
292  $N_{sp} - 1$  individuals have been drawn from the population.

293 The offspring is then altered by crossover and mutation. During crossover,  
294 information from the  $k_{\text{cat}}$  lists of two subsequent individuals in a population  
295 is exchanged, based on a user-defined crossover probability  $P_{co}$ . The crossover  
296 is performed by randomly selecting two points on the  $k_{\text{cat}}$  list, to mark the  
297 beginning and end of the list to be exchanged. After crossover, the individuals  
298 in the offspring are mutated based on the mutation probability  $P_m$ . For each  
299  $k_{\text{cat}}$  value to mutate, a new value is drawn from an uniform distribution from  
300 zero to twice the  $k_{\text{cat}}$  value, bounded by the diffusion limit of  $10^6\text{s}^{-1}$  or user-  
301 determined upper and lower bounds on the  $k_{\text{cat}}$  value.

302 After all evolutionary operations, a new population is created from the off-  
303 spring and the elite, and the fitness of all modified individuals is determined.  
304 The new population is passed on to the next generation until the maximal num-  
305 ber of generations is reached.

### 306 **1.3.3 Gene flow events and parallel computing**

307 Each population undergoes several generations, after which the populations are  
308 combined and reshuffled. Each subpopulation has equal population size  $N_{sp}$ ,  
309 which together sum up to the total population size  $N_p$ . Similar to the exchange  
310 genetics between independently evolved populations in classical genetics, we  
311 refer to each round of reshuffling and propagation with new populations as  
312 a 'gene flow event'. To make optimally use of the computational resources

313 available, each flow of generations within a gene flow event can be run on parallel  
 314 threads. After  $N_{GFE}$  gene flow events, the final population is determined and  
 315 the genetic algorithm is terminated.

Table S2: Overview of the main hyperparameters in the genetic algorithm. All hyperparameters can be found in the Github repository in the *HyperParameters* dataclass under Modules PAM\_parametrizer pam\_data\_classes.py.

| Parameter | Default value | Description                |
|-----------|---------------|----------------------------|
| $N_p$     | 10            | Population size            |
| $N_{sp}$  | 5             | Subpopulation size         |
| $N_E$     | 5             | Number of enzymes to adapt |
| $N_G$     | 10            | Number of generations      |
| $N_{GFE}$ | 2             | Number of gene flow events |
| $P_m$     | 0.9           | Mutation probability       |
| $P_{co}$  | 0.8           | Crossover probability      |

### 316 1.3.4 Optimizing the unused enzyme sector at zero growth

317 After parametrizing the active enzyme sector, the slope of the unused enzyme  
 318 sector is optimized by changing the amount of un- and underused enzymes at  
 319 zero growth. The amount of unused enzymes at zero growth can be determined  
 320 using protein overexpression experiments (1.1.1), but the amount of underused  
 321 enzymes is unknown [19]. This parameter is associated with the quantitative  
 322 effect the metabolic enzymes have on the phenotype by determining the increase  
 323 of the fraction for active enzymes with increasing growth rate, but does not  
 324 affect the qualitative relation between the turnover numbers of the individual  
 325 enzymes. Thus after optimizing the  $k_{cat}$  distribution, the slope of the unused  
 326 enzyme sector is optimized by minimizing the simulation error to experimental  
 327 data points. The optimization is performed using the local minimization of  
 328 scalar function of one variable as implemented in SciPy (acceptable error in  
 329 solution,  $xatol$ , set to  $10^{-3}$ ) [20], using the original intercept as a lower bound  
 330 and the fraction of un- and underused enzymes determined by O'Brien et al.  
 331 (2016) [19] ( $0.67g_{UE}/g_p$ ) as upper bound (Table S3).

### 332 1.3.5 Software implementation

333 The entire parametrization framework, including the genetic algorithm, are  
 334 available in Python at <https://github.com/iAMB-RWTH-Aachen/PAMParametrizer>.  
 335 The algorithm is based on the DEAP toolbox [21], amongst others. Table S3  
 336 gives an overview of the dependencies and specific functions. The framework  
 337 was run in Python 3.9 with DEAP v.1.4.1y and SciPy v.....

Table S3: Software dependencies of the PAMparametrizer toolbox

| Functionality                        | Package        | Function        | Settings                                                                                             | Reference |
|--------------------------------------|----------------|-----------------|------------------------------------------------------------------------------------------------------|-----------|
| Genetic Algorithm                    |                |                 |                                                                                                      |           |
| Creating a population of individuals | DEAP.tools     | initRepeat      |                                                                                                      | [21]      |
| Selection                            | DEAP.tools     | selBest         | 3 individuals<br>$k=N_{sp} - 1$                                                                      | [21]      |
| Crossover                            | DEAP.tools     | cxTwoPoint      |                                                                                                      | [21]      |
| Cloning                              | DEAP.base      | clone           |                                                                                                      | [21]      |
| PAMParametrizer                      |                |                 |                                                                                                      |           |
| Optimization of UES at zero growth   | SciPy.optimize | minimize_scalar | bounds=(0.37,0.67)<br>$g_{UES}/g_p \cdot g_p/g_{CDW}$<br>method='bounded'<br>options={'xatol': 1e-3} | [19, 20]  |

## 338 1.4 Comparing quantitative proteomics measurements to 339 simulated enzyme concentrations

340 Comparing simulated enzyme concentrations to quantitative proteomics data re-  
341 quires harmonizing units and resolving gene-protein-reaction associations. Ex-  
342 perimental measurements by Schmidt et al. (2016) include quantitative pro-  
343 teomics measurements at the peptide level in fg/cell, growth rates in 1/h,  
344 and cell volume in fl/cell [2]. The PAM predicts protein concentrations in  
345 mmol/ $g_{CDW}/h$ . These protein concentrations are valid for a single catalyti-  
346 cally active protein, which can catalyze multiple reactions and can be associ-  
347 ated to multiple peptides. Furthermore, the protein concentration allocated by  
348 the PAM is considered to be fully utilized for metabolic conversions, all protein  
349 mass not utilized is summarized in the unused enzymes sector. To compare  
350 the predicted and measured enzyme concentration, the units of the measure-  
351 ments and simulations were converted to  $g_{protein,i}/\sum g_{protein}$  for each reaction  
352  $i$ , where  $g_{protein,i}$  denotes the sum of concentrations of all proteins and peptides  
353 associated to reaction  $i$ .  $\sum g_{protein}$  also includes the unused protein fraction.

### 354 1.4.1 Mapping peptide concentrations to catalytic units

355 The experimental measurements report concentrations for individual peptides,  
356 but the PAM returns concentrations of enzyme units, which can consist out of  
357 one or multiple enzymes and/or enzyme complexes. Therefore, we calculate the  
358 enzyme concentrations and molar masses as follows:

- 359 • **Homomeric enzymes** retain their original concentrations and mass
- 360 • **Enzyme complexes** take the minimum concentration and the sum of  
361 molar masses of all participating peptides

362 • **Isozymes** take the sum concentration of all isozymes and retain their  
 363 original mass

364 As the PAM already includes enzyme complexes, the only modification to  
 365 simulated enzyme concentration was summation of the enzyme concentrations  
 366 associated to each reaction (isozyme).

#### 367 1.4.2 Unit conversions

368 The quantitative proteomics measurements were adjusted using information  
 369 about the cell volume of the cultured cells and an estimate on the amount  
 370 of  $g_{CDW}$  per volume of cells from Bakken and Olsen (1983) [22].

$$\rho_{wet} = 1.09 \quad (g_{wet}/cm^3) \quad (9)$$

$$f_{dry} = 0.3 \quad (g_{wet}/g_{dry}) \quad (10)$$

$$\rho_{dry} = \rho_{wet} \times 10^3 \times f_{dry} \quad (g_{dry}/L) \quad (11)$$

$$p_i = \frac{m_{p,i}}{V_{cell} \cdot \rho_{dry}} (g_{protein,i}/g_{dry}) \quad (12)$$

$$f_{protein,i} = \frac{p_i}{\sum g_{protein}} (g_{protein,i}/g_{protein}) \quad (13)$$

$$(14)$$

371 Where  $\rho_{wet}$  is amount of wet weight of cells per  $cm^3$ ,  $f_{dry}$  the fraction of dry  
 372 weight per wet weight of cells,  $\rho_{dry}$  the amount of dry weight per liter of cells,  
 373  $p_i$  is the amount of protein  $i$  in  $g_{protein,i}/g_{CDW}$ ,  $m_{p,i}$  is the measured protein  
 374 mass in  $fg/cell$ , and  $V_{cell}$  is the volume in  $fl$  of a single cell. The protein fractions  
 375  $f_{protein,i}$  in  $g_{protein,i}/g_{protein}$  are subsequently calculated by dividing each protein  
 376 fraction  $p_i$  by the sum of all protein fractions.

377 The PAM predicts enzyme concentrations in  $mmol/g_{CDW}$ , and only covers  
 378 the enzyme mass which is fully metabolically active. The units thus need to be  
 379 converted to the mass of enzymes per total mass of all metabolically active and  
 380 unused metabolic enzymes.

$$p_i = \epsilon_i \cdot molmass_i \cdot 10^{-3} (g_{protein,i}/g_{dry}) \quad (15)$$

$$f_{protein,i} = \frac{p_i}{\sum g_{protein} + w_{UE} \cdot \mu + \phi_{UE,0}} (g_{protein,i}/g_{protein}) \quad (16)$$

$$(17)$$

381 where  $\epsilon_i$  is the simulated enzyme concentration of enzyme  $i$  in  $mmol/g_{CDW}$ ,  
 382  $molmass_i$  is the molar mass of enzyme  $i$  in  $g/mol$ ,  $10^{-3}$  converts  $mmol$  to  $mol$ ,  
 383 and  $w_{UE}$  and  $\phi_{UE,0}$  are the slope and intercept, respectively, of the relationship  
 384 between unused enzymes and the growth rate  $\mu$  in  $1/h$ .

## 385 2 Supplementary Discussion

### 386 2.1 Description of the updated Protein Allocation Model 387 structure

#### 388 2.1.1 Translational protein sector

389 Using experimental data from Schmidt et al. (2016) [2], we find that trans-  
390 lational protein abundance does not exhibit a strictly linear correlation with  
391 growth rate across the full range of physiologically plausible growth rates (Sup-  
392 plementary Figure S3), despite previous studies suggesting such a relation-  
393 ship [2, 9, 23–26]. The linear correlation seems to cease when *E. coli* enters  
394 the overflow metabolic regime. This indicates that when the microorganism  
395 needs to consume more substrate to establish an increase in growth rate, also  
396 the requirement of translational proteins rises. Furthermore, there exists an  
397 indirect correlation between the glucose abundance in *E. coli* to the transla-  
398 tional protein fraction by CRP-cAMP [3, 27, 28] and ppGpp [4, 5, 29]. Increased  
399 carbon uptake activates CRP-cAMP signaling, leading to a downregulation of  
400 catabolic protein expression while promoting ribosome and anabolic protein  
401 synthesis, driven by the accumulation of biomass precursors [3]. Under nutri-  
402 ent limitation, synthesis of ppGpp is triggered, which is an inhibitor of rRNA  
403 and tRNA synthesis [5, 29, 30]. Both observations suggest that the translational  
404 protein sector is not related to the growth rate, but to the substrate uptake  
405 rate. Indeed, when we establish a relationship between glucose uptake rate and  
406 translational sector, the model captures the experimentally observed fraction of  
407 translational proteins (Supplementary Figure S3).

#### 408 2.1.2 Unused protein sector

409 To correct for un- and underused enzymes, the PAM includes an unused enzymes  
410 sector, based on the findings of O’Brien and colleagues (2015) [1, 6]. This sector  
411 enables us to assume all the enzymes in the metabolic sector are operating at  
412 their maximal *in vivo* catalytic efficiency under biologically plausible conditions.  
413 In the original PAM, the fraction of unused proteins is assumed to be zero at  
414 the maximal growth rate. However, emerging evidence suggests that even at  
415 maximum growth rates, a fraction of unused proteins persists, likely due to  
416 bet-hedging strategies to adapt to fluctuating conditions in ecological niches  
417 [7, 31, 32]. Even if all the protein capacity is optimally used at the maximal  
418 growth rate, no higher growth rates can be achieved after adaptive laboratory  
419 evolution, unless the mutations enzymes improve the catalytic efficiency of these  
420 enzymes. Analysis of adapted strains showed that part of the proteome fraction  
421 for housekeeping can be allocated to metabolic or translational proteins after  
422 multiple generations [8, 10]. This might be the result of mutations in proteins  
423 such as RNA polymerase and *PyFk*, which direct the transcriptional regulation  
424 towards condition-specific proteins [8, 10]. Furthermore, there are suggestions  
425 that after ALE experiments, all proteins operate near their *in vivo* maximum  
426 [10]. In our definition, this part of the proteome falls into the unused protein

<sup>427</sup> sector, as it can be allocated to growth. Assuming that after ALE, the protein  
<sup>428</sup> allocation is optimal, e.g. there is no more protein space left to invest in growth,  
<sup>429</sup> we can assume that at the maximal growth rate of the evolved strains, the  
<sup>430</sup> unused protein sector is zero.

431 **3 Supplementary Tables**

Table S4: Statistics for the  $k_{\text{cat}}$  (Figure 2B of the main text) and flux (Supplementary Figure S5) distributions for protein allocation models parametrized with different parameter sets, as obtained from GotEzymes [33], after preprocessing, or from different alternative parametrizations. The flux distribution was obtained from simulations with the different models with upper bound of glucose uptake set to 11 mmol/g<sub>CDW</sub>/h. AUC: Area under the curve.

| Model               | <b><math>k_{\text{cat}}</math> distributions</b> |                   |                  | <b>Flux distribution</b> |                   |                   | Growth rate |
|---------------------|--------------------------------------------------|-------------------|------------------|--------------------------|-------------------|-------------------|-------------|
|                     | Median                                           | Mean              | AUC              | Median                   | Mean              | AUC               |             |
|                     | 1/s                                              |                   |                  | mmol/g <sub>CDW</sub> /h |                   |                   |             |
| iML1515             |                                                  |                   | 0.09             | 2.03                     | $3.12 \cdot 10^4$ | 0.97              |             |
| GotEzymes           | 13.7                                             | 296               | $2.6 \cdot 10^5$ | 0.01                     | 0.85              | $7.44 \cdot 10^3$ | 0.11        |
| After preprocessing | 95.9                                             | $2.07 \cdot 10^3$ | $1.9 \cdot 10^6$ | 0.10                     | 2.10              | $2.67 \cdot 10^4$ | 0.77        |
| Alternative 1       | 95.9                                             | $2.07 \cdot 10^3$ | $1.8 \cdot 10^6$ | 0.07                     | 1.56              | $1.65 \cdot 10^4$ | 0.56        |
| Alternative 2       | 95.9                                             | $2.07 \cdot 10^3$ | $1.9 \cdot 10^6$ | 0.08                     | 1.86              | $1.98 \cdot 10^4$ | 0.64        |
| Alternative 3       | 95.9                                             | $2.07 \cdot 10^3$ | $1.9 \cdot 10^6$ | 0.08                     | 1.78              | $2.03 \cdot 10^4$ | 0.63        |
| Alternative 4       | 95.9                                             | $2.07 \cdot 10^3$ | $1.9 \cdot 10^6$ | 0.08                     | 2.02              | $2.09 \cdot 10^4$ | 0.62        |
| Alternative 5       | 95.9                                             | $2.07 \cdot 10^3$ | $1.9 \cdot 10^6$ | 0.07                     | 1.73              | $2.22 \cdot 10^4$ | 0.64        |
| Alternative 6       | 95.9                                             | $2.07 \cdot 10^3$ | $1.9 \cdot 10^6$ | 0.078                    | 1.54              | $3.56 \cdot 10^4$ | 0.61        |
| Alternative 7       | 95.9                                             | $2.07 \cdot 10^3$ | $1.9 \cdot 10^6$ | 0.08                     | 1.80              | $1.87 \cdot 10^4$ | 0.61        |
| Alternative 8       | 95.9                                             | $2.07 \cdot 10^3$ | $1.9 \cdot 10^6$ | 0.08                     | 2.10              | $2.38 \cdot 10^4$ | 0.66        |
| Alternative 9       | 95.9                                             | $2.07 \cdot 10^3$ | $1.9 \cdot 10^6$ | 0.08                     | 2.15              | $2.35 \cdot 10^4$ | 0.65        |
| Alternative 10      | 95.9                                             | $2.07 \cdot 10^3$ | $1.9 \cdot 10^6$ | 0.08                     | 1.63              | $1.83 \cdot 10^4$ | 0.66        |

Table S5: Summary statistics for the absolute difference between simulated fluxes and measured fluxes for different parameter sets of the *Escherichia coli* Protein Allocation Model (PAM). Flux comparison was performed for five different dilution rates for growth on glucose (experimental data from Nanchen et al. (2006) and Rijsewijk et al. (2011) [34,35]) and eight different carbon sources (experimental measurements from Gerosa et al. (2015) [36]). All differences are given in mmol/g<sub>CDW</sub>/h. Stdev: standard deviation to the mean difference.

| Model          | Glucose |      |       | Multiple carbon sources |      |       |
|----------------|---------|------|-------|-------------------------|------|-------|
|                | Median  | Mean | Stdev | Median                  | Mean | Stdev |
| iML1515        | 0.41    | 0.32 | 0.99  | 0.00                    | 0.15 | 6.69  |
| GotEnzymes     | 0.46    | 0.21 | 2.20  | 0.00                    | 0.83 | 5.01  |
| Curated        | 0.41    | 0.33 | 1.02  | 0.47                    | 1.73 | 4.26  |
| Alternative 1  | 0.39    | 0.23 | 1.68  | 0.18                    | 1.51 | 4.18  |
| Alternative 2  | 0.39    | 0.24 | 0.93  | 0.13                    | 1.45 | 4.25  |
| Alternative 3  | 0.44    | 0.74 | 1.42  | 0.18                    | 1.52 | 4.20  |
| Alternative 4  | 0.42    | 0.50 | 0.95  | 0.18                    | 1.51 | 4.21  |
| Alternative 5  | 0.42    | 0.50 | 0.94  | 0.18                    | 1.48 | 4.22  |
| Alternative 6  | 0.39    | 0.27 | 0.98  | 0.18                    | 1.43 | 4.24  |
| Alternative 7  | 0.43    | 0.73 | 1.47  | 0.18                    | 1.50 | 4.19  |
| Alternative 8  | 0.42    | 0.73 | 1.42  | 0.18                    | 1.55 | 4.18  |
| Alternative 9  | 0.42    | 0.65 | 1.33  | 0.18                    | 1.52 | 4.22  |
| Alternative 10 | 0.41    | 0.66 | 1.36  | 0.18                    | 1.51 | 4.19  |

Table S6: Reaction-protein mapping used to map the most sensitive enzymes in Figure 2B of the main text to reaction identifiers. Each enzyme is represented by a single reaction (in bold), although multiple reactions can be associated with the same enzyme. Each enzyme-reaction association group is separated by lines. Reaction identifiers are from the BiGG model namespace [37].

| Model enzyme                                                                                           | BiGG reaction identifier | Reaction description                 |
|--------------------------------------------------------------------------------------------------------|--------------------------|--------------------------------------|
| P0A6E6_P0AB98_P0ABA0_P0ABA4<br>_P0ABA6_P0ABB0_P0ABB4_P0ABC0<br>_P68699                                 | <b>ATPS4rpp</b>          | ATP synthase                         |
| P0AFC3_P0AFC7_P0AFD1_P0AFD4<br>_P0AFD6_P0AFE0_P0AFE4_P0AFE8<br>_P0AFF0_P31979_P33599_P33602<br>_P33607 | <b>NADH16pp-18pp</b>     | NADH dehydrogenase                   |
| P0ABI8_P0ABJ1_P0ABJ3_P0ABJ6                                                                            | <b>CYTBO3_4pp</b>        | Cytochrome oxidase bo3               |
| P0A6P9                                                                                                 | <b>ENO</b>               | Enolase                              |
| P06959_P0A9P0_P0AFG8                                                                                   | <b>PDH</b>               | Pyruvate dehydrogenase               |
| P0AB80                                                                                                 | <b>ILETA</b>             | Isoleucine transaminase              |
| P0AB80                                                                                                 | LEUTAi                   | Leucine transaminase (irreversible)  |
| P0AB80                                                                                                 | PHETA1                   | Phenylalanine transaminase           |
| P0AB80                                                                                                 | TYRTA                    | Tyrosine transaminase                |
| P0AB80                                                                                                 | VALTA                    | Valine transaminase                  |
| P0AGB0                                                                                                 | PSP_L                    | Phosphoserine phosphatase (L-serine) |
| P15640                                                                                                 | PRAGSr                   | Phosphoribosylglycinamide synthase   |
| P00509                                                                                                 | ASPTA                    | Aspartate transaminase               |
| P00509                                                                                                 | CYSTA                    | Cysteine transaminase                |
| P00509                                                                                                 | PHETA1                   | Phenylalanine transaminas            |
| P00509                                                                                                 | TYRTA                    | Tyrosine transaminase                |

Table S7: Description of abbreviations used to indicate reaction fluxes in central carbon metabolism in Figure 5A and 5B of the main text and Supplementary Figure S8. Reaction identifiers are from the BiGG model namespace [37].

| BiGG reaction identifier | Reaction description                                              |
|--------------------------|-------------------------------------------------------------------|
| EX_gly_e                 | Glycerol exchange                                                 |
| EX_tre_e                 | Trehalose exchange                                                |
| GLCt2pp                  | D-glucose transport in via proton symport (periplasm)             |
| GLCDpp                   | Glucose dehydrogenase (ubiquinone-8 as acceptor) (periplasm)      |
| GAD2ktp                  | Gluconate 2 dehydrogenase periplasm                               |
| GNK                      | Gluconokinase                                                     |
| 2DHGLCK                  | Dehydrogluconokinase                                              |
| PGLCNDH                  | Phosphogluconate 2 dehydrogenase                                  |
| HEX1                     | Hexokinase (D-glucose:ATP)                                        |
| PGI                      | Glucose-6-phosphate isomerase                                     |
| PFK                      | Phosphofructokinase                                               |
| FBA                      | Fructose-bisphosphate aldolase                                    |
| FBP                      | Fructose-bisphosphatase                                           |
| TPI                      | Triose-phosphate isomerase                                        |
| GAPD                     | Glyceraldehyde-3-phosphate dehydrogenase                          |
| PGK                      | Phosphoglycerate kinase                                           |
| PGM                      | Phosphoglycerate mutase                                           |
| ENO                      | Enolase                                                           |
| PYK                      | Pyruvate kinase                                                   |
| EDD                      | 6-phosphogluconate dehydratase                                    |
| EDA                      | 2-dehydro-3-deoxy-phosphogluconate aldolase                       |
| TKT1                     | Transketolase                                                     |
| PGL                      | 6-phosphogluconolactonase                                         |
| GND                      | Phosphogluconate dehydrogenase                                    |
| RPI                      | Ribose-5-phosphate isomerase                                      |
| RPE                      | Ribulose 5-phosphate 3-epimerase                                  |
| TALA                     | Transaldolase                                                     |
| PDH                      | Pyruvate dehydrogenase                                            |
| CS                       | Citrate synthase                                                  |
| PC                       | Pyruvate carboxylase                                              |
| OAADC                    | Oxaloacetate decarboxylase                                        |
| ACONTa/ACONTb            | Aconitase                                                         |
| ICDHyr                   | Isocitrate dehydrogenase (NADP)                                   |
| SUCOAS                   | Succinyl-CoA synthetase (ADP-forming)                             |
| SUCDi                    | Succinate dehydrogenase (irreversible)                            |
| FUM                      | Fumarase                                                          |
| MDH                      | Malate dehydrogenase                                              |
| ME2                      | Malic enzyme (NADP)                                               |
| PPC                      | Phosphoenolpyruvate carboxylase                                   |
| PPS                      | Phosphoenolpyruvate synthase                                      |
| PPCK                     | Phosphoenolpyruvate carboxykinase                                 |
| F6PA                     | Fructose 6-phosphate aldolase                                     |
| DHAPT                    | Dihydroxyacetone phosphotransferase                               |
| PFK <sub>3</sub>         | <sup>20</sup> Phosphofructokinase (s7p)                           |
| FBA3                     | Sedoheptulose 1,7-bisphosphate D-glyceraldehyde-3-phosphate-lyase |

Table S8: Parametrization of the coarse-grained protein sectors for the *Pseudomonas putida* and *Corynebacterium glutamicum* Protein Allocation Models.

| Protein Sector                    | substrate | Slope                  | Intercept             | Reference  |
|-----------------------------------|-----------|------------------------|-----------------------|------------|
| <i>Pseudomonas putida</i>         |           |                        |                       |            |
| Translational Proteins            | Glucose   | $-4.73 \cdot 10^{-3}$  | $4.72 \cdot 10^{-2}$  | This study |
|                                   | Glycerol  | $-2.91 \cdot 10^{-17}$ | $4.72 \cdot 10^{-2}$  |            |
|                                   | Succinate | $-2.56 \cdot 10^{-3}$  | $4.721 \cdot 10^{-2}$ |            |
|                                   | Benzoate  | $-4.20 \cdot 10^{-3}$  | $4.72 \cdot 10^{-2}$  |            |
| Unused Enzymes                    | Glucose   | $1.60 \cdot 10^{-2}$   | 0.20                  | This study |
|                                   | Glycerol  | $0.98 \cdot 10^{-2}$   | 0.20                  |            |
|                                   | Succinate | $0.87 \cdot 10^{-2}$   | 0.20                  |            |
|                                   | Benzoate  | $1.42 \cdot 10^{-3}$   | $4.61 \cdot 10^{-2}$  |            |
| <i>Corynebacterium glutamicum</i> |           |                        |                       |            |
| Translational Proteins            | Glucose   | $-2.09 \cdot 10^{-3}$  | $7.39 \cdot 10^{-2}$  | [38]       |
|                                   | Gluconate | $-6.26 \cdot 10^{-3}$  | $5.56 \cdot 10^{-2}$  | This study |
|                                   | Succinate | $-3.66 \cdot 10^{-3}$  | $5.56 \cdot 10^{-2}$  |            |
|                                   | Fructose  | $-6.92 \cdot 10^{-3}$  | $5.56 \cdot 10^{-2}$  |            |
| Unused Enzymes                    | Glucose   | $2.12 \cdot 10^{-2}$   | 0.20                  | [38, 39]   |
|                                   | Gluconate | $1.91 \cdot 10^{-2}$   | 0.20                  | This study |
|                                   | Succinate | $1.11 \cdot 10^{-2}$   | 0.20                  |            |
|                                   | Fructose  | $2.11 \cdot 10^{-2}$   | 0.20                  |            |

432 4 Supplementary Figures

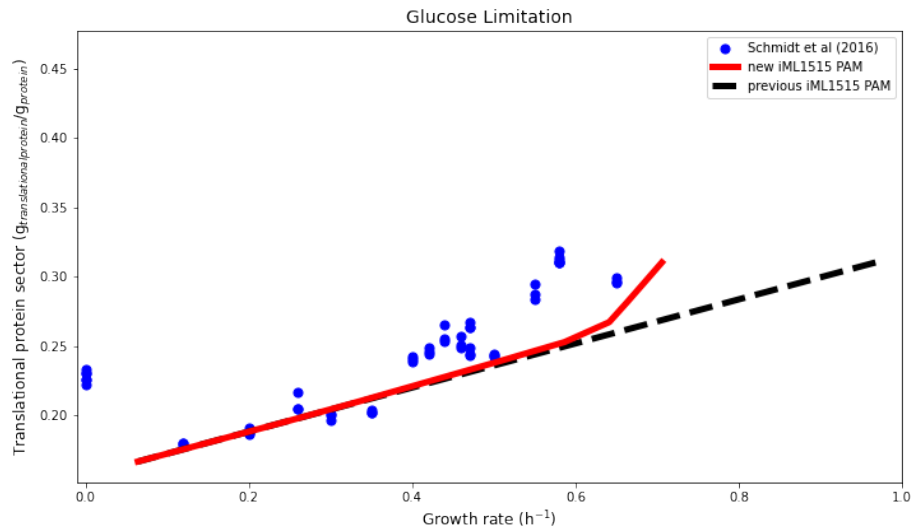

Figure S3: Translational proteins as function of the biomass production rate. Quantitative proteomics measurements from Schmidt et al (2016) [2] (points) do not seem to be linearly related to the growth rate. The previous iML1515 PAM (the protein allocation model (PAM) as published by Alter et al. (2021) [1]) includes a linear relation between the translational sector and the biomass production rate. In the new iML1515 PAM, the translational sector is linearly related to the substrate uptake rate, which results in a non-linear relation to biomass formation.

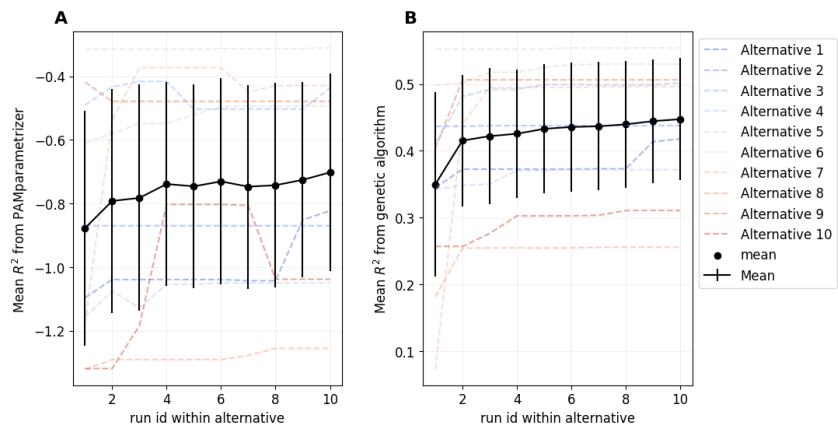

Figure S4:  $R^2$  value as function of different iterations of the PAMparametrizer for ten different parametrizations of the *Escherichia coli* Protein Allocation Model. Error bars indicate the standard deviation from the mean error of the different models. (A)  $R^2$  calculated by the PAMparametrizer without weights, (B)  $R^2$  calculated by the genetic algorithm, with a weight of 7 on the growth rate and a weight of 3 on the acetate secretion rate (see methods),

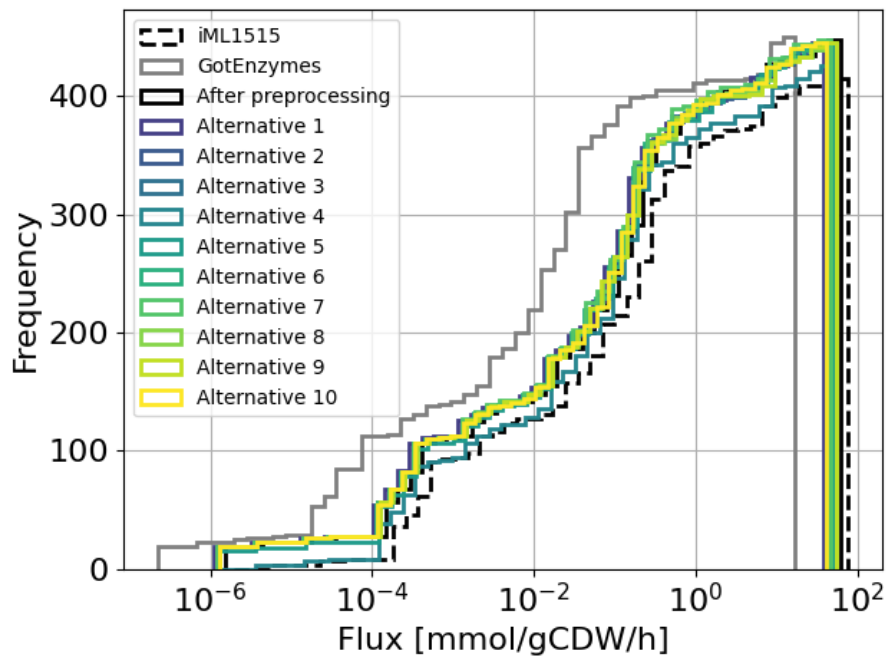

Figure S5: Cumulative distribution of the fluxes simulated by Protein Allocation Models for *Escherichia coli* with different parameter sets: one from the GotEnzymes database [14], one after preprocessing, and ten alternative parameter sets resulting from the PAMParameterizer.

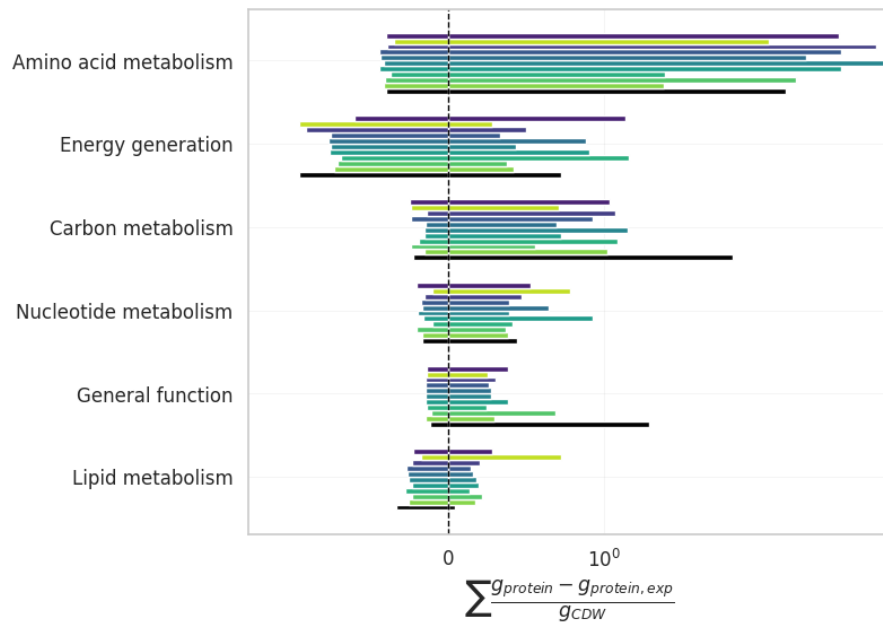

Figure S6: Difference between simulated protein concentrations to experimental measurements per clusters of orthologous genes (COGs). Only the COGs with a total difference of  $10 \text{ g}_{protein}/\text{g}_{CDW}$  are shown. The annotation 'metabolism', also includes transport functionality. Experimental measurements were taken from Schmidt et al. (2016) at the following growth rates: 0.35, 0.5 and  $0.67 \text{ h}^{-1}$  [2].

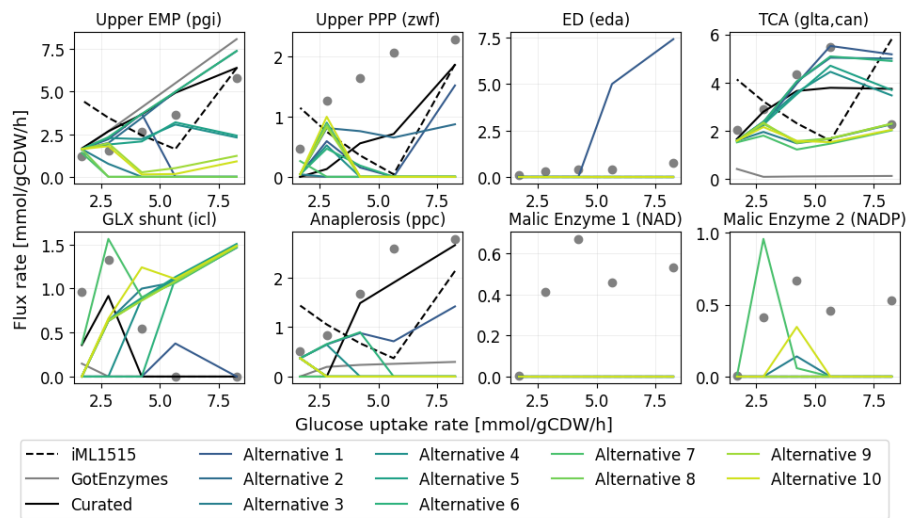

Figure S7: Simulated intracellular fluxes for as a function of the glucose uptake rate for ten different parametrizations of the *Escherichia coli* Protein Allocation Model. Points indicate experimental measurements from Nanchen et al. (2006) and Rijsewijk et al. (2011) [34,35]. All flux rates are given in mmol/g<sub>CDW</sub>/h

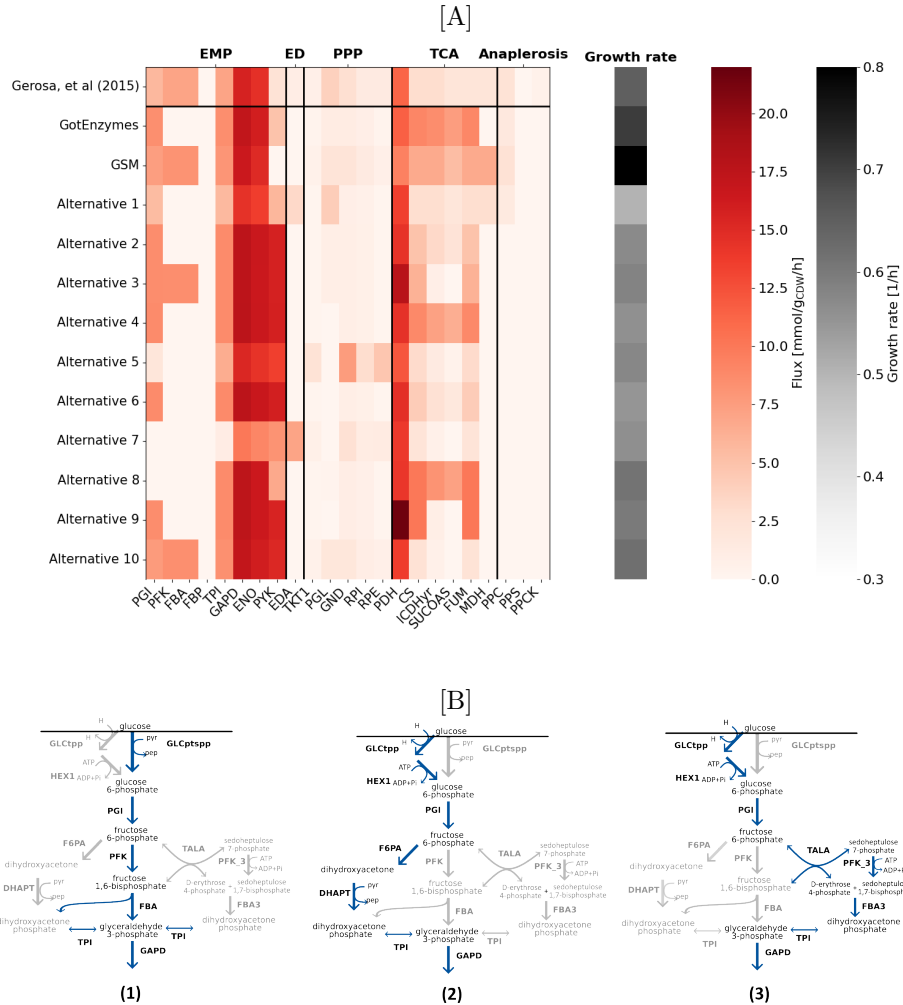

Figure S8: Glucose catabolism in *Escherichia coli* (*E. coli*) as predicted by genome-scale models (GEMs) and Protein Allocation Models (PAMs). (A) Simulated intracellular fluxes by *E. coli* PAMs created using parameters from GotEnzymes and ten alternatives resulting from parametrization at a glucose uptake rate of 9.65 mmol/g<sub>CDW</sub>/h compared to experimental <sup>13</sup>C flux measurement from Gerosa, (2015) [36]. (B) Stoichiometrically equivalent routes for glucose catabolization in *E. coli*. Abbreviations of the reaction identifiers are specified in Supplementary Table S7

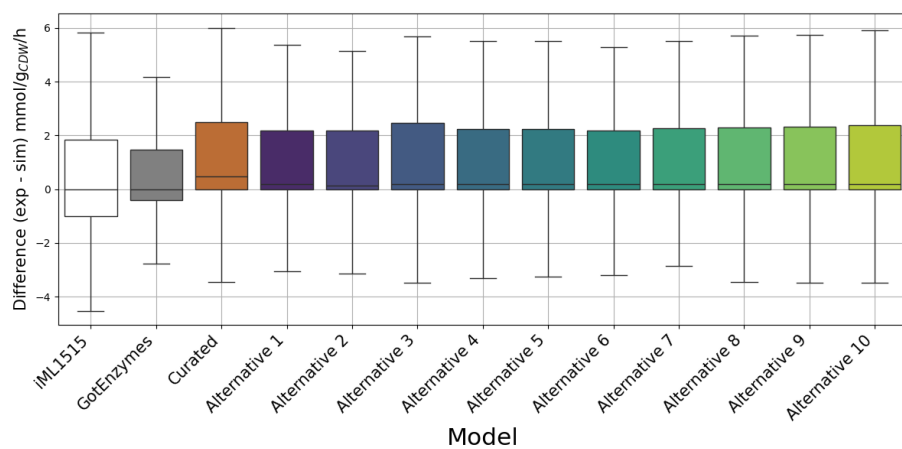

Figure S9: Difference between the measured intracellular fluxes for growth on seven different carbon sources from Gerosa et al. (2015) [36] and the corresponding simulated fluxes of different *Escherichia coli* Protein Allocation Models, including a manually curated PAM from Alter et al. (2021) [1].

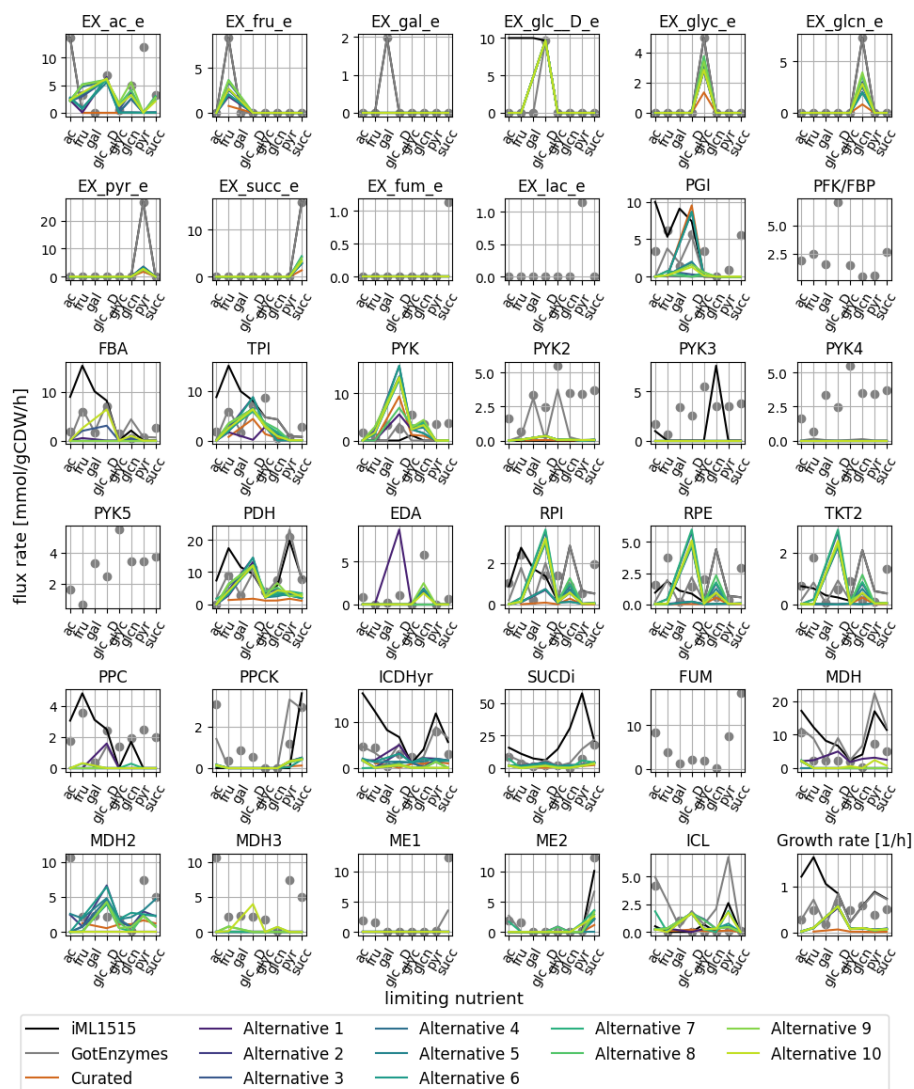

Figure S10: Simulated intracellular fluxes for growth on seven different carbon sources for ten different parametrizations of the *E. coli* Protein Allocation Model. Points indicate experimental measurements from Gerosa et al. (2015) [36]. All flux rates are given in mmol/g<sub>CDW</sub>/h.

## 433 References

- 434 [1] T. B. Alter, L. M. Blank, and B. E. Ebert, “Proteome regulation patterns  
435 determine *Escherichia coli* wild-type and mutant phenotypes,” *mSystems*,  
436 vol. 6, pp. e00625–20, Apr. 2021.
- 437 [2] A. Schmidt, K. Kochanowski, S. Vedelaar, E. Ahrné, B. Volkmer, L. Cal-  
438 lipo, K. Knoops, M. Bauer, R. Aebersold, and M. Heinemann, “The  
439 quantitative and condition-dependent *Escherichia coli* proteome,” *Nature*  
440 *Biotechnology*, vol. 34, pp. 104–110, Jan. 2016.
- 441 [3] C. You, H. Okano, S. Hui, Z. Zhang, M. Kim, C. W. Gunderson, Y.-P.  
442 Wang, P. Lenz, D. Yan, and T. Hwa, “Coordination of bacterial proteome  
443 with metabolism by cyclic AMP signalling,” *Nature*, vol. 500, pp. 301–306,  
444 Aug. 2013.
- 445 [4] B. W. Anderson, D. K. Fung, and J. D. Wang, “Regulatory themes and  
446 variations by the stress-signaling nucleotide alarmones (p)ppGpp in bacte-  
447 ria,” *Annual Review of Genetics*, vol. 55, pp. 115–133, Nov. 2021.
- 448 [5] R. Droghetti, P. Fuchs, I. Iuliani, V. Firmano, G. Tallarico, L. Calabrese,  
449 J. Grilli, B. Sclavi, L. Ciandrini, and M. Cosentino Lagomarsino, “Inco-  
450 herent feedback from coupled amino acids and ribosome pools generates  
451 damped oscillations in growing *E. coli*,” *Nature Communications*, vol. 16,  
452 p. 3063, Mar. 2025.
- 453 [6] E. J. O’Brien, J. Utrilla, and B. O. Palsson, “Quantification and classi-  
454 fication of *E. coli* proteome utilization and unused protein costs across  
455 environments,” *PLOS Computational Biology*, vol. 12, p. e1004998, June  
456 2016.
- 457 [7] F. J. Bruggeman, B. Teusink, and R. Steuer, “Trade-offs between the in-  
458 stantaneous growth rate and long-term fitness: Consequences for micro-  
459 bial physiology and predictive computational models,” *BioEssays*, vol. 45,  
460 no. 10, p. 2300015, 2023.
- 461 [8] J. Utrilla, E. O’Brien, K. Chen, D. McCloskey, J. Cheung, H. Wang,  
462 D. Armenta-Medina, A. Feist, and B. Palsson, “Global rebalancing of cellu-  
463 lar resources by pleiotropic point mutations illustrates a multi-scale mech-  
464 anism of adaptive evolution,” *Cell Systems*, vol. 2, pp. 260–271, Apr. 2016.
- 465 [9] F. J. Bruggeman, R. Planqué, D. Molenaar, and B. Teusink, “Searching for  
466 principles of microbial physiology,” *FEMS Microbiology Reviews*, vol. 44,  
467 pp. 821–844, Nov. 2020.
- 468 [10] M. Mori, V. Patsalo, C. Euler, J. R. Williamson, and M. Scott, “Proteome  
469 partitioning constraints in long-term laboratory evolution,” *Nature Com-  
470 munications*, vol. 15, p. 4087, May 2024.

- 471 [11] D. Machado, M. J. Herrgård, and I. Rocha, “Stoichiometric representation  
472 of gene–protein–reaction associations leverages constraint-based analysis  
473 from reaction to gene-level phenotype prediction,” *PLoS Computational*  
474 *Biology*, vol. 12, p. e1005140, Oct. 2016.
- 475 [12] M. S. Bienick, K. W. Young, J. R. Klesmith, E. E. Detwiler, K. J. Tomek,  
476 and T. A. Whitehead, “The interrelationship between promoter strength,  
477 gene expression, and growth rate,” *PLOS ONE*, vol. 9, p. e109105, Oct.  
478 2014.
- 479 [13] M. Kafri, E. Metz-Raz, G. Jona, and N. Barkai, “The cost of protein  
480 production,” *Cell Reports*, vol. 14, pp. 22–31, Dec. 2015.
- 481 [14] F. Li, Y. Chen, M. Anton, and J. Nielsen, “GotEnzymes: an exten-  
482 sive database of enzyme parameter predictions,” *Nucleic Acids Research*,  
483 vol. 51, pp. D583–D586, Jan. 2023.
- 484 [15] The UniProt Consortium, “UniProt: the Universal Protein Knowledgebase  
485 in 2023,” *Nucleic Acids Research*, vol. 51, pp. D523–D531, Jan. 2023.
- 486 [16] S. van den Bogaard, P. A. Saa, and T. B. Alter, “Sensitivities in protein al-  
487 location models reveal distribution of metabolic capacity and flux control,”  
488 *Bioinformatics*, p. btae691, Nov. 2024.
- 489 [17] M. Srinivas and L. Patnaik, “Adaptive probabilities of crossover and mu-  
490 tation in genetic algorithms,” *IEEE Transactions on Systems, Man, and*  
491 *Cybernetics*, vol. 24, pp. 656–667, Apr. 1994.
- 492 [18] T. B. Alter, L. M. Blank, and B. E. Ebert, “Genetic optimization algorithm  
493 for metabolic engineering revisited,” *Metabolites*, vol. 8, p. 33, May 2018.
- 494 [19] E. J. O’Brien, J. M. Monk, and B. O. Palsson, “Using Genome-scale Models  
495 to Predict Biological Capabilities,” *Cell*, vol. 161, pp. 971–987, May 2015.
- 496 [20] P. Virtanen, R. Gommers, T. E. Oliphant, M. Haberland, T. Reddy,  
497 D. Cournapeau, E. Burovski, P. Peterson, W. Weckesser, J. Bright, S. J.  
498 van der Walt, M. Brett, J. Wilson, K. J. Millman, N. Mayorov, A. R. J.  
499 Nelson, E. Jones, R. Kern, E. Larson, C. J. Carey, Í. Polat, Y. Feng, E. W.  
500 Moore, J. VanderPlas, D. Laxalde, J. Perktold, R. Cimrman, I. Henriksen,  
501 E. A. Quintero, C. R. Harris, A. M. Archibald, A. H. Ribeiro, F. Pedregosa,  
502 P. van Mulbregt, and SciPy 1.0 Contributors, “SciPy 1.0: Fundamental  
503 Algorithms for Scientific Computing in Python,” *Nature Methods*, vol. 17,  
504 pp. 261–272, 2020.
- 505 [21] F.-A. Fortin, “DEAP: Evolutionary Algorithms Made Easy,” *Journal of*  
506 *Machine Learning Research*, pp. 2171–2175, July 2012.
- 507 [22] L. R. Bakken and R. A. Olsen, “Buoyant densities and dry-matter contents  
508 of microorganisms: Conversion of a measured biovolume into biomass,”  
509 *Applied and Environmental Microbiology*, vol. 45, pp. 1188–1195, Apr. 1983.

- 510 [23] M. Scott, C. W. Gunderson, E. M. Mateescu, Z. Zhang, and T. Hwa, “Inter-  
511 dependence of cell growth and gene expression: Origins and consequences,”  
512 *Science*, vol. 330, pp. 1099–1102, Nov. 2010.
- 513 [24] K. Peebo, K. Valgepea, A. Maser, R. Nahku, K. Adamberg, and R. Vilu,  
514 “Proteome reallocation in *Escherichia coli* with increasing specific growth  
515 rate,” *Molecular BioSystems*, vol. 11, pp. 1184–1193, Mar. 2015.
- 516 [25] S. Hui, J. M. Silverman, S. S. Chen, D. W. Erickson, M. Basan, J. Wang,  
517 T. Hwa, and J. R. Williamson, “Quantitative proteomic analysis reveals a  
518 simple strategy of global resource allocation in bacteria,” *Molecular Sys-  
519 tems Biology*, vol. 11, p. 784, Feb. 2015.
- 520 [26] X. Dai, M. Zhu, M. Warren, R. Balakrishnan, V. Patsalo, H. Okano, J. R.  
521 Williamson, K. Fredrick, Y.-P. Wang, and T. Hwa, “Reduction of translat-  
522 ing ribosomes enables *Escherichia coli* to maintain elongation rates during  
523 slow growth,” *Nature Microbiology*, vol. 2, pp. 1–9, Dec. 2016.
- 524 [27] B. Görke and J. Stülke, “Carbon catabolite repression in bacteria: many  
525 ways to make the most out of nutrients,” *Nature Reviews Microbiology*,  
526 vol. 6, pp. 613–624, Aug. 2008.
- 527 [28] A. Kolb, S. Busby, H. Buc, S. Garges, and S. Adhya, “Transcriptional regu-  
528 lation by cAMP and its receptor protein,” *Annual Review of Biochemistry*,  
529 vol. 62, pp. 749–797, July 1993.
- 530 [29] K. Potrykus, H. Murphy, N. Philippe, and M. Cashel, “ppGpp is the ma-  
531 jor source of growth rate control in *E. coli*,” *Environmental Microbiology*,  
532 vol. 13, pp. 563–575, Mar. 2011.
- 533 [30] E. Bosdriesz, D. Molenaar, B. Teusink, and F. J. Bruggeman, “How fast-  
534 growing bacteria robustly tune their ribosome concentration to approxi-  
535 mate growth-rate maximization,” *The FEBS Journal*, vol. 282, pp. 2029–  
536 2044, May 2015.
- 537 [31] M. Basan, T. Honda, D. Christodoulou, M. Hörl, Y.-F. Chang, E. Leoncini,  
538 A. Mukherjee, H. Okano, B. R. Taylor, J. M. Silverman, C. Sanchez, J. R.  
539 Williamson, J. Paulsson, T. Hwa, and U. Sauer, “A universal trade-off  
540 between growth and lag in fluctuating environments,” *Nature*, vol. 584,  
541 pp. 470–474, Aug. 2020.
- 542 [32] M. Mori, S. Schink, D. W. Erickson, U. Gerland, and T. Hwa, “Quantify-  
543 ing the benefit of a proteome reserve in fluctuating environments,” *Nature  
544 Communications*, vol. 8, p. 1225, Oct. 2017.
- 545 [33] F. Li, L. Yuan, H. Lu, G. Li, Y. Chen, M. K. M. Engqvist, E. J.  
546 Kerkhoven, and J. Nielsen, “Deep learning-based kcat prediction enables  
547 improved enzyme-constrained model reconstruction,” *Nature Catalysis*,  
548 vol. 5, pp. 662–672, June 2022.

- 549 [34] A. Nanchen, A. Schicker, and U. Sauer, “Nonlinear dependency of intra-  
550 cellular fluxes on growth rate in miniaturized continuous cultures of *Es-*  
551 *cherichia coli*,” *Applied and Environmental Microbiology*, vol. 72, pp. 1164–  
552 1172, Feb. 2006.
- 553 [35] B. R. B. Haverkorn van Rijsewijk, A. Nanchen, S. Nallet, R. J. Kleijn,  
554 and U. Sauer, “Large-scale  $^{13}\text{C}$ -flux analysis reveals distinct transcriptional  
555 control of respiratory and fermentative metabolism in *Escherichia coli*,”  
556 *Molecular Systems Biology*, vol. 7, p. 477, Jan. 2011.
- 557 [36] L. Gerosa, B. R. B. Haverkorn van Rijsewijk, D. Christodoulou,  
558 K. Kochanowski, T. S. B. Schmidt, E. Noor, and U. Sauer, “Pseudo-  
559 transition analysis identifies the key regulators of dynamic metabolic adap-  
560 tations from steady-state data,” *Cell Systems*, vol. 1, pp. 270–282, Oct.  
561 2015.
- 562 [37] Z. A. King, J. Lu, A. Dräger, P. Miller, S. Federowicz, J. A. Lerman,  
563 A. Ebrahim, B. O. Palsson, and N. E. Lewis, “BiGG Models: A platform  
564 for integrating, standardizing and sharing genome-scale models,” *Nucleic*  
565 *Acids Research*, vol. 44, pp. D515–D522, Jan. 2016.
- 566 [38] S. Matamouros, T. Gensch, M. Cerff, C. C. Sachs, I. Abdollahzadeh, J. Hen-  
567 driks, L. Horst, N. Tenhaef, J. Tenhaef, S. Noack, M. Graf, R. Takors,  
568 K. Nöh, and M. Bott, “Growth-rate dependency of ribosome abundance  
569 and translation elongation rate in *Corynebacterium glutamicum* differs from  
570 that in *Escherichia coli*,” *Nature Communications*, vol. 14, p. 5611, Sept.  
571 2023.
- 572 [39] M. Graf, T. Haas, A. Teleki, A. Feith, M. Cerff, W. Wiechert, K. Nöh,  
573 T. Busche, J. Kalinowski, and R. Takors, “Revisiting the growth modu-  
574 lon of *Corynebacterium glutamicum* under glucose-limited chemostat con-  
575 ditions,” *Frontiers in Bioengineering and Biotechnology*, vol. 8, Oct. 2020.
